# Supplementary material for: Interpretations on the Interaction between Protein Tyrosine Phosphatase and E7 Oncoproteins of High and Low-Risk HPV: A Computational Perception
Source: PubMed Central journal article supplement — ACS Omega. 2021 Jun 17;6(25):16472–87. doi: 10.1021/acsomega.1c01619 (PMC8246469; doi:10.1021/acsomega.1c01619), 2021-06-17
Supplement: ao1c01619_si_001.pdf [file ao1c01619_si_001.pdf]

**Interpretations on the interaction between protein tyrosine Phosphatase and E7 oncoproteins of high and low risk HPV – A computational perception**

**Murali Aarthy and Sanjeev Kumar Singh\***

**Computer Aided Drug Design and Molecular Modeling Lab, Department of Bioinformatics, Alagappa University, Karaikudi - 630004**

\*E-mail: [skysanjeev@gmail.com](mailto:skysanjeev@gmail.com)

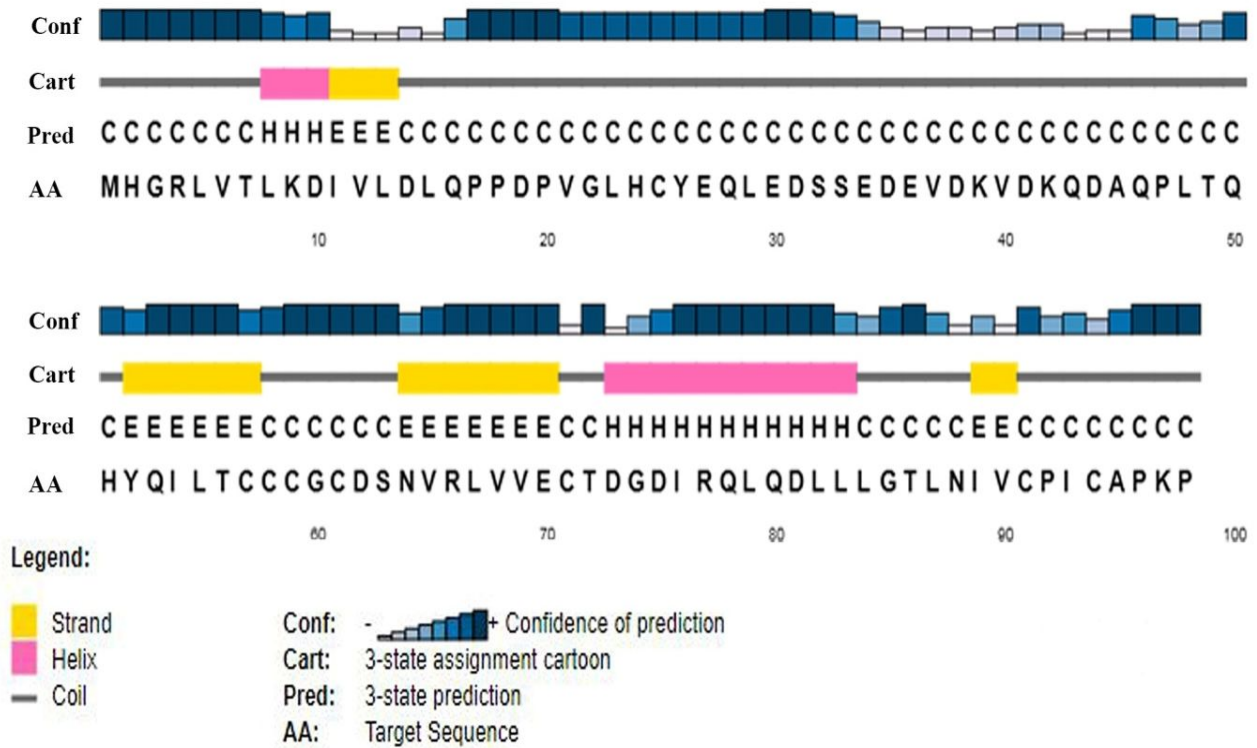

**Supplementary Figure S1: Secondary structure prediction for the E7 oncoprotein of HPV genotype 11**



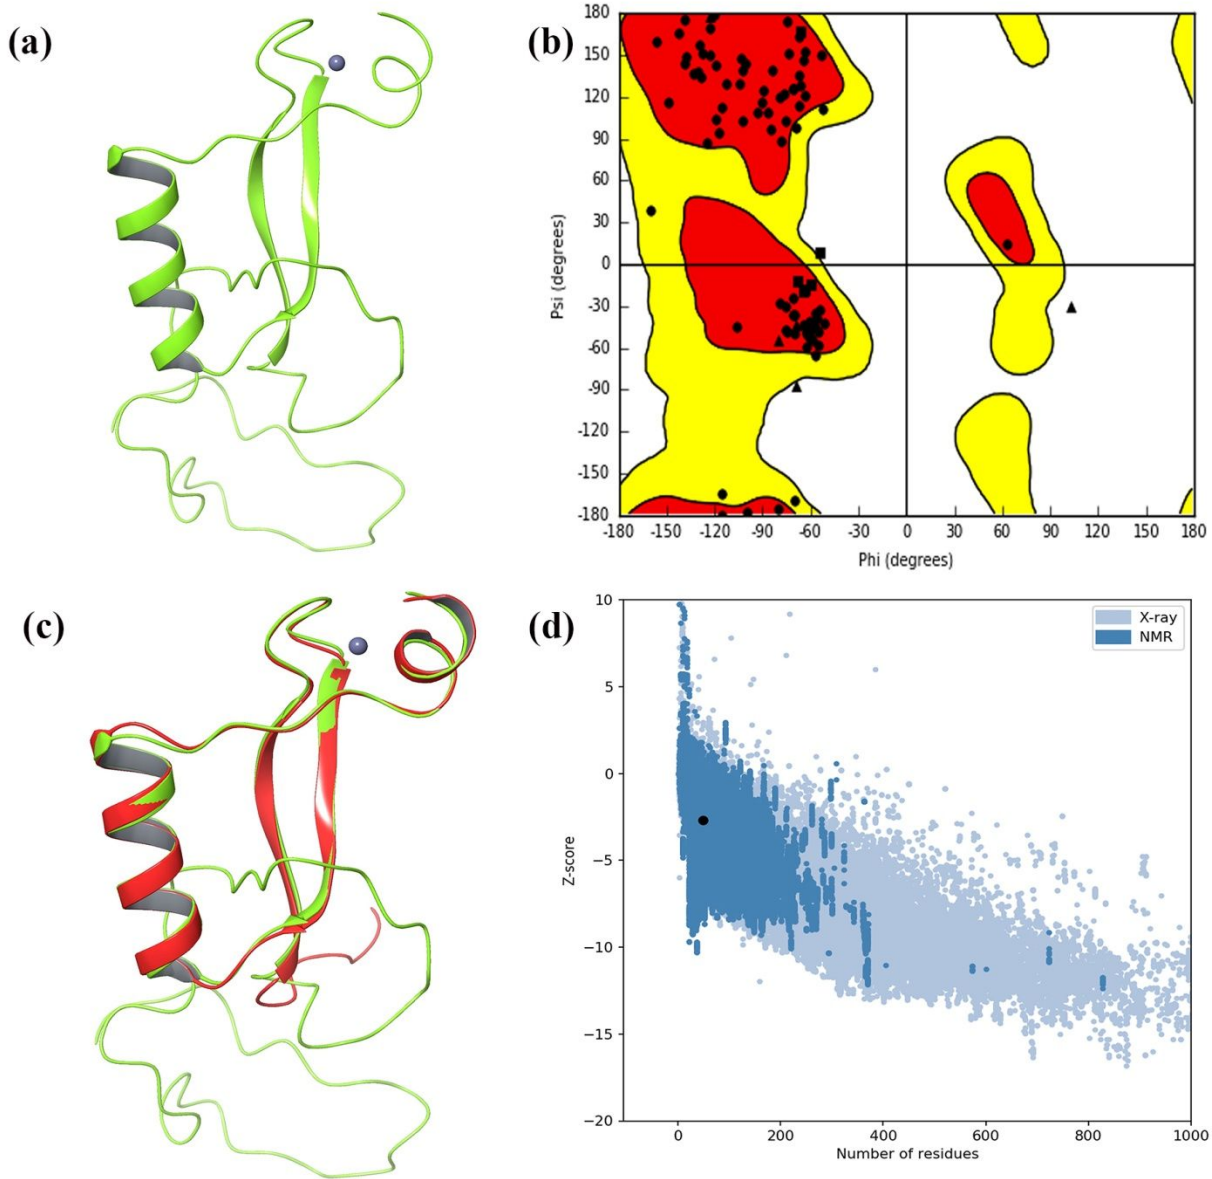

**Supplementary Figure S3: (a) represents the structure of the Modelled HPV 11 E7 and (c) represents the superimposed structure of the template and the modelled structure whereas (b) and (d) represents the Ramachandran plot and the ProSA score as an assessment for the modelled E7 oncoprotein respectively.**

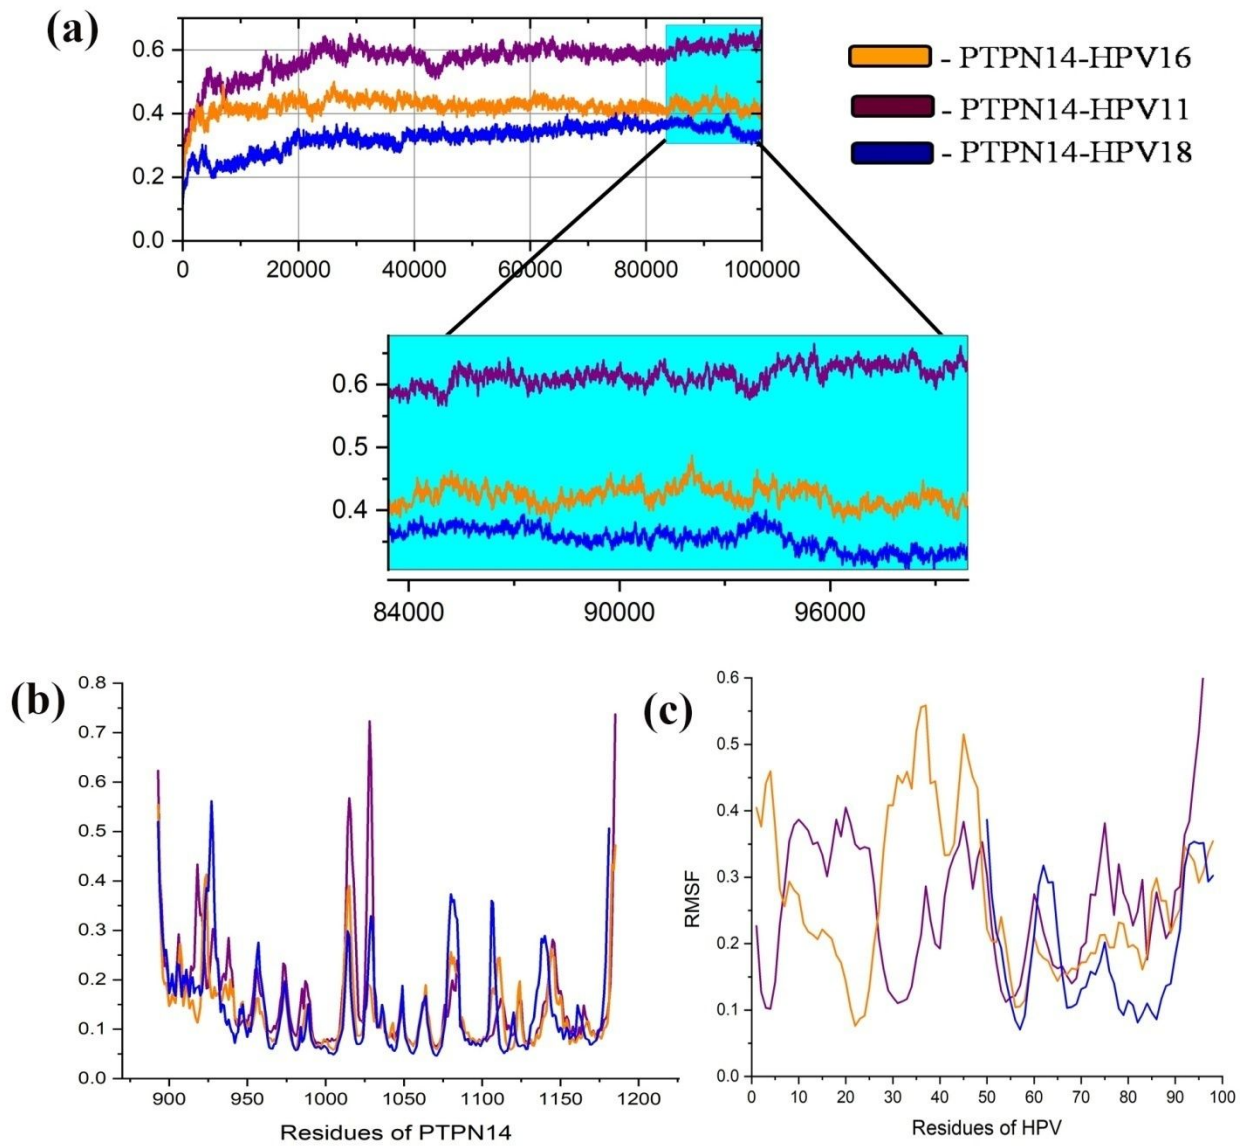

**Supplementary Figure S4: Molecular Dynamics Simulation Protein – Protein complexes (a) RMSD, (b) RMSF of PTPN14 Residues, (c) RMSF of HPV E7 residues.**

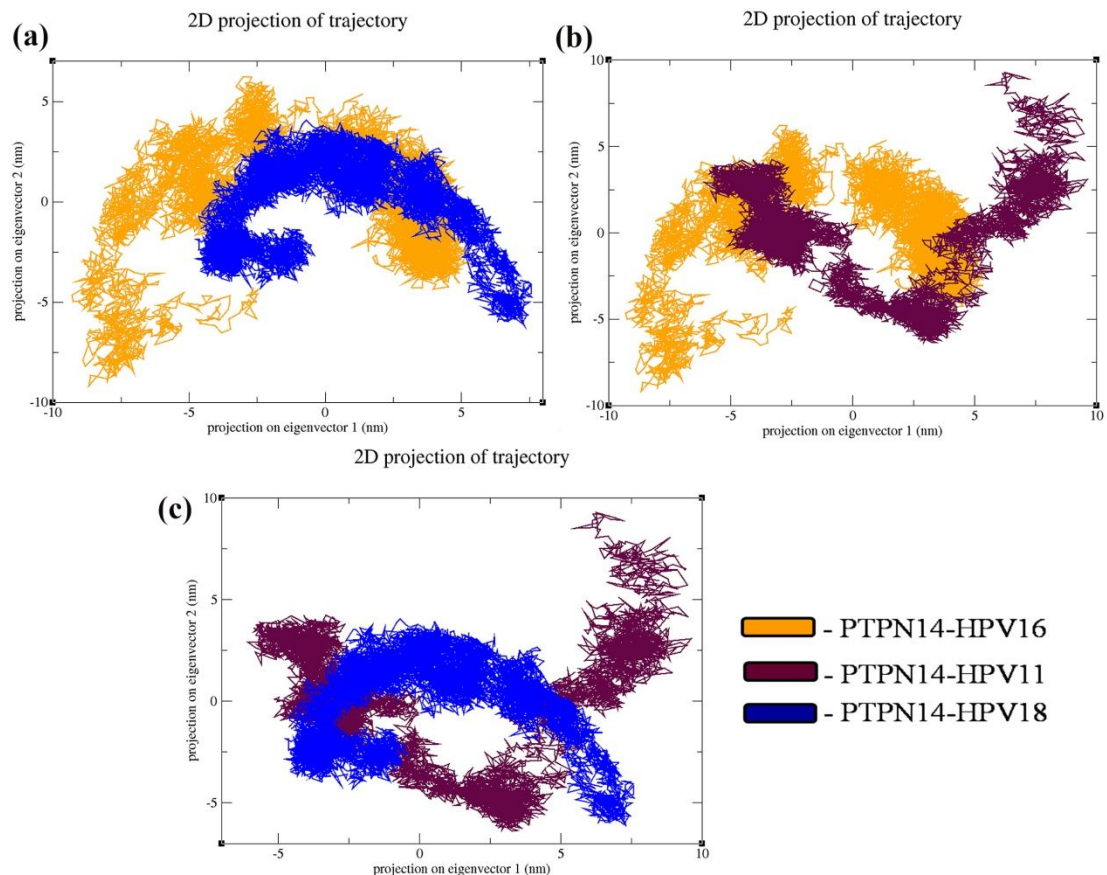

**Supplementary Figure S5: Principle component analysis (a) PTPN14 with HPV11 & 18 E7 (b) PTPN14 with HPV16 and 11 E7 and (c) PTPN14 with HPV11 & 18 E7.**

**Supplementary Table S1: List of Compounds obtained from the Previous work**

| S.No | Compound Name | Library                         | Reference |
|------|---------------|---------------------------------|-----------|
| 1.   | 692320        | National Chemical Library       | 24        |
| 2.   | 678359        | National Chemical Library       | 24        |
| 3.   | 657269        | National Chemical Library       | 24        |
| 4.   | DB00419       | FDA library                     | 24        |
| 5.   | EGCG          | Natural Compound from Green Tea | 25        |
| 6.   | JFD01914      | Maybridge Library               | 24        |
| 7.   | ZINC14436185  | ZINC Database                   | 25        |
| 8.   | ZINC49069570  | ZINC Database                   | 25        |
| 9.   | ZINC49115270  | ZINC Database                   | 25        |

**Supplementary Table S2: Docking scores for the compounds and high risk and low risk bounded to PTPN14**

| S.No | Compound     | Docking scores |         | Glide energy |         | Glide Emodel |          |
|------|--------------|----------------|---------|--------------|---------|--------------|----------|
|      |              | HPV 11         | HPV 16  | HPV 11       | HPV 16  | HPV 11       | HPV 16   |
| 1.   | 692320       | -12.899        | -13.735 | -62.300      | -73.978 | -95.797      | -116.490 |
| 2.   | 678359       | -8.841         | -9.365  | -54.061      | -63.969 | -86.044      | -80.154  |
| 3.   | 657269       | -7.147         | -10.244 | -44.616      | -51.555 | -67.186      | -72.911  |
| 4.   | DB00419      | -8.967         | -9.844  | -60.236      | -60.343 | -77.589      | -74.491  |
| 5.   | EGCG         | -11.884        | -12.061 | -69.860      | -71.539 | -90.116      | -109.353 |
| 6.   | JFD01914     | -9.404         | -8.14   | -63.637      | -64.345 | -85.940      | -81.219  |
| 7.   | ZINC14436185 | -10.889        | -11.514 | -65.518      | -64.935 | -73.191      | -82.235  |
| 8.   | ZINC49069570 | -12.421        | -14.148 | -63.187      | -77.720 | -104.198     | 94.251   |
| 9.   | ZINC49115270 | -13.143        | -13.318 | -13.143      | -70.634 | -84.794      | -111.032 |

**Supplementary Table S3: Binding Free Energy Post Docking studies for the Complex HPV 16 – PTPN14 and small molecules**

| S.No | Compound     | $\Delta G_{\text{bind}}$ | $\Delta G_{\text{Coulomb}}$ | $\Delta G_{\text{Covalent}}$ | $\Delta G_{\text{Hbond}}$ | $\Delta G_{\text{Solv}}$ | $\Delta G_{\text{vdW}}$ |
|------|--------------|--------------------------|-----------------------------|------------------------------|---------------------------|--------------------------|-------------------------|
| 1.   | 692320       | -81.89                   | -51.02                      | 15.30                        | -4.88                     | 278.33                   | -47.90                  |
| 2.   | 678359       | -48.21                   | -21.98                      | 6.214                        | -1.76                     | 145.29                   | -30.78                  |
| 3.   | 657269       | -53.26                   | -38.70                      | 5.12                         | -2.69                     | 164.49                   | -31.72                  |
| 4.   | DB00419      | -64.11                   | -47.47                      | 6.05                         | -2.31                     | 34.46                    | -28.11                  |
| 5.   | EGCG         | -72.40                   | -53.19                      | 4.98                         | -1.33                     | 45.73                    | -33.41                  |
| 6.   | JFD01914     | -56.05                   | -29.44                      | 3.35                         | -2.87                     | 58.24                    | -22.62                  |
| 7.   | ZINC14436185 | -69.64                   | -31.43                      | 4.10                         | -2.62                     | 34.12                    | -32.70                  |
| 8.   | ZINC49069570 | -93.54                   | -63.78                      | 17.16                        | -3.43                     | 128.12                   | -49.18                  |
| 9.   | ZINC49115270 | -86.12                   | -55.07                      | 10.58                        | -4.69                     | 98.14                    | -44.21                  |

**Supplementary Table S4: Binding Free Energy Post Docking studies for the Complex HPV 11 – PTPN14 and small molecules**

| S.No | Compound     | $\Delta G_{\text{bind}}$ | $\Delta G_{\text{Coulomb}}$ | $\Delta G_{\text{Covalent}}$ | $\Delta G_{\text{Hbond}}$ | $\Delta G_{\text{Solv}}$ | $\Delta G_{\text{vdW}}$ |
|------|--------------|--------------------------|-----------------------------|------------------------------|---------------------------|--------------------------|-------------------------|
| 1.   | 692320       | -71.11                   | -39.73                      | 5.31                         | -4.48                     | 18.75                    | -51.86                  |
| 2.   | 678359       | -57.42                   | -22.86                      | 4.02                         | -3.79                     | 57.88                    | -30.87                  |
| 3.   | 657269       | -69.12                   | -33.47                      | 6.54                         | -4.40                     | 57.79                    | -42.60                  |
| 4.   | DB00419      | -68.32                   | -30.54                      | 11.01                        | -7.86                     | 34.28                    | -29.40                  |
| 5.   | EGCG         | -66.33                   | -41.64                      | 8.76                         | -6.10                     | 27.52                    | -35.50                  |
| 6.   | JFD01914     | -59.05                   | -34.12                      | 6.42                         | -5.91                     | 42.59                    | -39.95                  |
| 7.   | ZINC14436185 | -78.72                   | -57.08                      | 10.07                        | -7.19                     | 38.88                    | -56.68                  |
| 8.   | ZINC49069570 | -70.40                   | -54.56                      | 7.21                         | -5.16                     | 66.68                    | -63.18                  |
| 9.   | ZINC49115270 | -82.61                   | -63.07                      | 9.65                         | -6.08                     | 73.53                    | -59.24                  |

**Supplementary Table S5: Post Dynamics binding Free Energy for the Complex HPV 16 – PTPN14 and best small molecules**

| S.No | Compound     | Binding           | Van der Waals     | Electrostatic     | Polar            | Solvation       |
|------|--------------|-------------------|-------------------|-------------------|------------------|-----------------|
| 1.   | 692320       | -82.056 ± 14.960  | -71.250 ± 18.772  | -41.850 ± 28.930  | 63.396 ± 22.944  | -10.741 ± 1.512 |
| 2.   | EGCG         | -120.074 ± 10.011 | -98.521 ± 18.114  | -56.197 ± 15.321  | 120.365 ± 23.450 | -18.963 ± 3.042 |
| 3.   | ZINC49115270 | -234.331 ± 48.176 | -211.280 ± 17.887 | -182.435 ± 69.081 | 181.950 ± 39.021 | -22.565 ± 1.233 |
| 4.   | ZINC49069570 | -242.722 ± 27.813 | -233.365 ± 16.755 | -286.362 ± 41.289 | 300.395 ± 20.941 | -23.390 ± 0.924 |

**Supplementary Table S6: Post Dynamics binding Free Energy for the Complex HPV 11 – PTPN14 and best small molecules**

| S.No | Compound     | Binding           | Van der Waals     | Electrostatic     | Polar            | Solvation       |
|------|--------------|-------------------|-------------------|-------------------|------------------|-----------------|
| 1.   | 692320       | -92.455 ± 11.491  | -87.439 ± 14.194  | -81.437 ± 25.338  | 96.923 ± 17.400  | -10.470 ± 0.756 |
| 2.   | EGCG         | -185.205 ± 14.592 | -156.951 ± 21.620 | -165.956 ± 32.208 | 208.660 ± 22.659 | -22.799 ± 1.147 |
| 3.   | ZINC49115270 | -205.088 ± 13.708 | -180.183 ± 22.170 | -208.483 ± 35.583 | 252.459 ± 24.928 | -20.722 ± 1.219 |
| 4.   | ZINC49069570 | -261.703 ± 26.106 | -199.813 ± 18.640 | -320.073 ± 47.593 | 279.613 ± 224.24 | -21.429 ± 1.083 |
